# Supplementary material for: Heavy Metals in Soil around a Typical Antimony Mine Area of China: Pollution Characteristics, Land Cover Influence and Source Identification
Source: MDPI journal article supplement (doi:10.3390/ijerph20032177), 2023-01-25
Supplement: s1 [file s1]

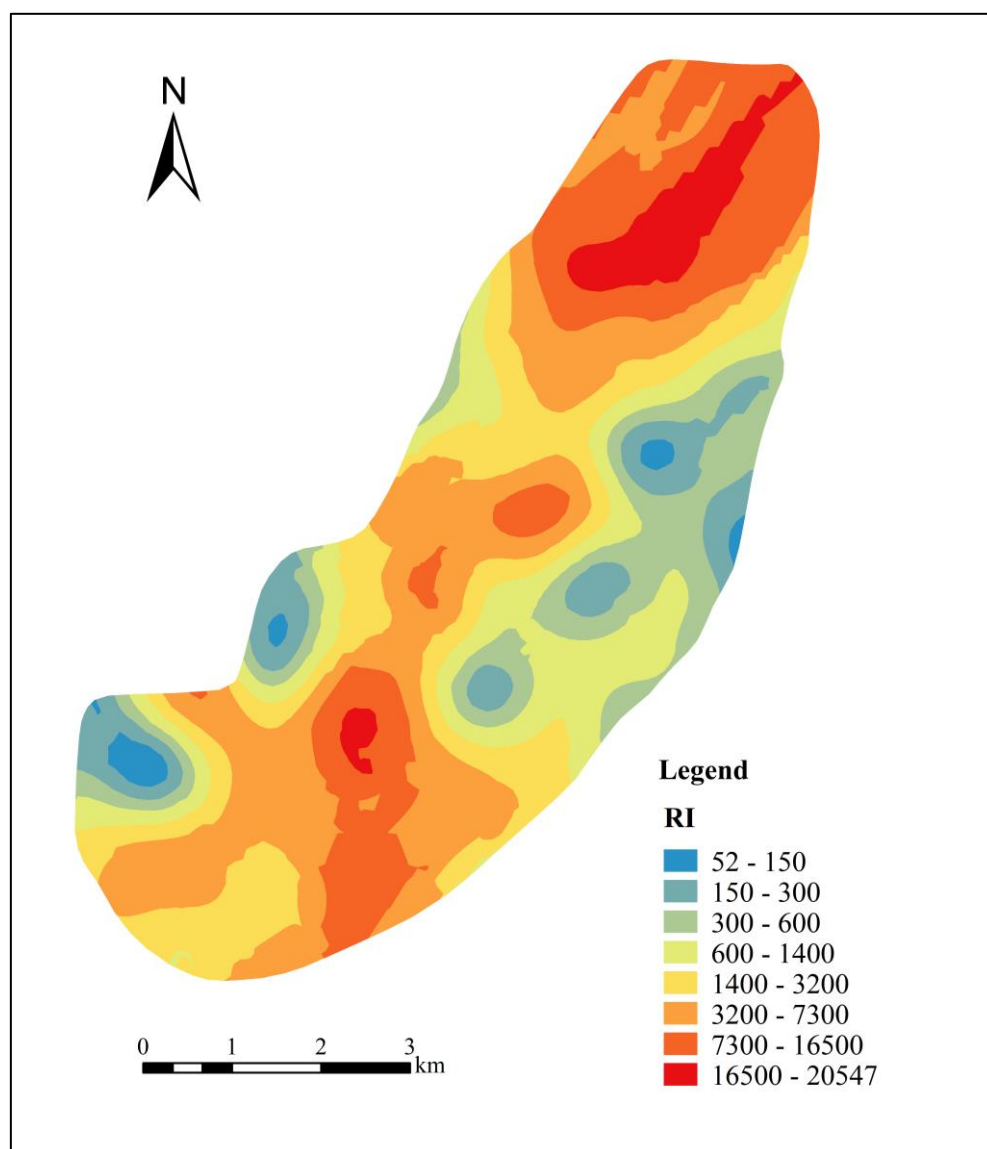

**Figure S1.** Distribution map of the potential ecological risk index (*RI*) of soil heavy metal contamination of the study area.

**Table S1.** Ordinary Kriging interpolation prediction errors of soil heavy metal concentrations in the study area.

| Element | Mean error | Mean standardized error | Average standard error | Root mean square error | Root mean square standardized error |
|---------|------------|-------------------------|------------------------|------------------------|-------------------------------------|
| Sb      | -0.120     | -0.008                  | 1043.680               | 1101.115               | 1.050                               |
| As      | -0.230     | -0.005                  | 47.370                 | 51.340                 | 1.082                               |
| Cu      | 0.310      | 0.010                   | 25.260                 | 21.873                 | 0.904                               |
| Zn      | -0.450     | -0.006                  | 219.40                 | 197.64                 | 0.964                               |
| Pb      | 0.800      | 0.010                   | 44.890                 | 47.174                 | 1.093                               |
| Cr      | -0.490     | -0.016                  | 32.873                 | 35.110                 | 1.050                               |
| Ni      | -0.480     | -0.016                  | 19.480                 | 24.187                 | 1.220                               |
| Cd      | -0.040     | -0.002                  | 5.501                  | 8.095                  | 1.380                               |
| Hg      | 0.085      | 0.016                   | 5.442                  | 5.054                  | 0.954                               |

The judging criterion: the absolute value of the mean error and the mean standardized error were close to 0, the average standard error is close to root mean square error, and the root mean square standardized error is close to 1.

**Table S2.** Classification criteria for Nemerow's comprehensive pollution index ( $P_s$ ).

| $P_s$ value          | Class | Contamination situation |
|----------------------|-------|-------------------------|
| $P_s \leq 0.7$       | 1     | Safety                  |
| $0.7 < P_s \leq 1.0$ | 2     | Precaution              |
| $1.0 < P_s \leq 2.0$ | 3     | Slightly polluted       |
| $2.0 < P_s \leq 3.0$ | 4     | Moderately polluted     |
| $P_s > 3.0$          | 5     | Severely polluted       |

**Table S3.** Classification criteria of the potential ecological risk for heavy metal contamination.

| $E_r^i$ value          | Class | Level of single heavy metal ecological risk | RI value            | Class | Level of comprehensive potential ecological risk |
|------------------------|-------|---------------------------------------------|---------------------|-------|--------------------------------------------------|
| $E_r^i < 40$           | 1     | Low risk                                    | $RI < 150$          | 1     | Low risk                                         |
| $40 \leq E_r^i < 80$   | 2     | Moderate risk                               | $150 \leq RI < 300$ | 2     | Moderate risk                                    |
| $80 \leq E_r^i < 160$  | 3     | Considerable risk                           | $300 \leq RI < 600$ | 3     | Considerable risk                                |
| $160 \leq E_r^i < 320$ | 4     | High risk                                   | $RI \geq 600$       | 4     | Very high risk                                   |
| $E_r^i \geq 320$       | 5     | Very high risk                              |                     |       |                                                  |

**Table S4.** Correlation analysis of soil heavy metals of the study area.

|    | Sb     | As       | Hg       | Cr       | Cd       | Pb      | Cu       | Zn    | Ni |
|----|--------|----------|----------|----------|----------|---------|----------|-------|----|
| Sb | 1      |          |          |          |          |         |          |       |    |
| As | 0.256  | 1        |          |          |          |         |          |       |    |
| Hg | 0.465  | 0.403 ** | 1        |          |          |         |          |       |    |
| Cr | -0.171 | 0.065    | -0.034   | 1        |          |         |          |       |    |
| Cd | 0.059  | 0.115    | 0.000    | -0.017   | 1        |         |          |       |    |
| Pb | 0.269  | 0.505 ** | 0.822 ** | 0.108    | 0.133    | 1       |          |       |    |
| Cu | 0.069  | 0.250    | 0.051    | 0.630 ** | 0.174    | 0.384 * | 1        |       |    |
| Zn | 0.293  | 0.391 *  | 0.067    | 0.130    | 0.470 ** | 0.329 * | 0.422 ** | 1     |    |
| Ni | -0.223 | -0.135   | -0.198   | 0.768 ** | 0.110    | -0.064  | 0.355 *  | 0.127 | 1  |

\*\* : At 0.01 level (double tail), the correlation is significant. \* : At 0.05 level (double tail), the correlation is significant.
